# Supplementary material for: Immune cells and their inflammatory mediators modify β cells and cause checkpoint inhibitor–induced diabetes
Source: JCI Insight. 2022 Sep 8;7(17):e156330. doi: 10.1172/jci.insight.156330 (PMC9536276; doi:10.1172/jci.insight.156330)
Supplement: Supplemental data [file jciinsight-7-156330-s029.pdf]

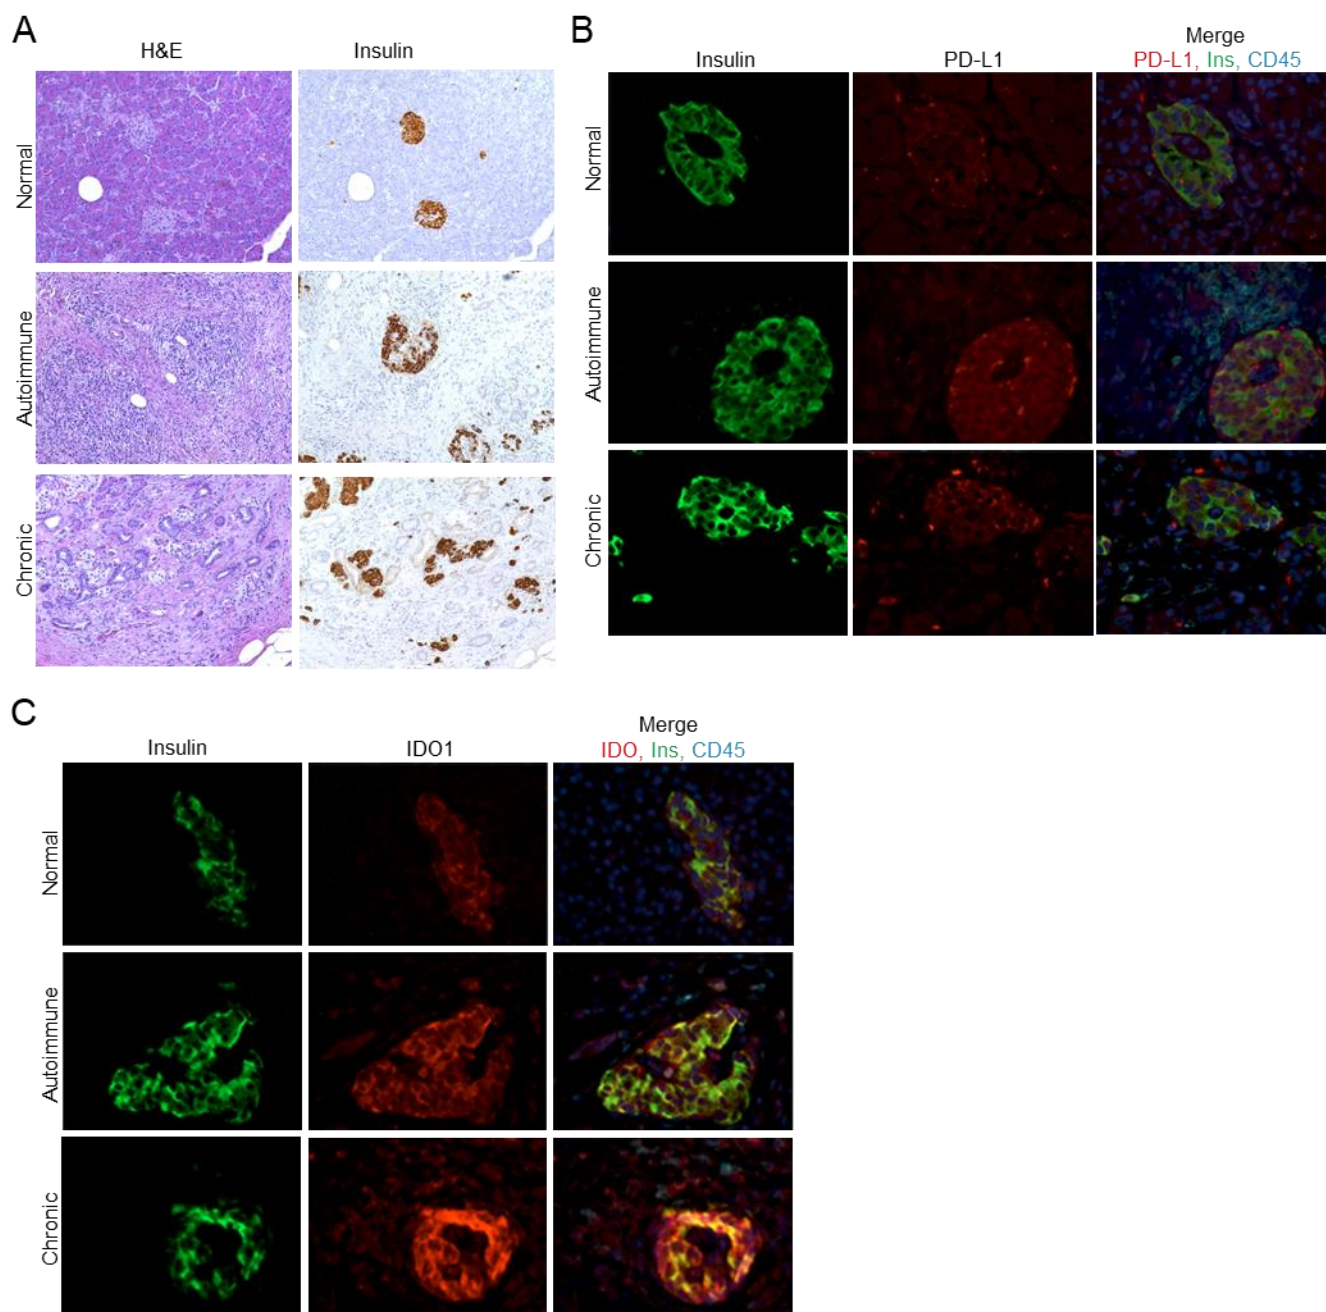

**Supplemental Figure 1. PD-L1 and IDO1 are expressed in islets in the setting of pancreatitis.** (A) Representative images of H&E and insulin staining from pancreatic samples with known inflammation, autoimmune and chronic pancreatitis, and normal pancreas. Taken with a 10x/25 eyepiece and 10x objective (Leica DMi8). (B) Representative images of immunostaining of pancreatic samples with autoimmune and chronic pancreatitis for PD-L1 (green=insulin, red = PD-L1, blue=CD45). (C) Representative images of immunostaining of pancreatic samples with autoimmune and chronic pancreatitis for IDO1 (green=insulin, red = IDO1, blue=CD45). Images for B and C were taken with a 10x/23 eyepiece and 20x objective (Zeiss Axiovert 200M).

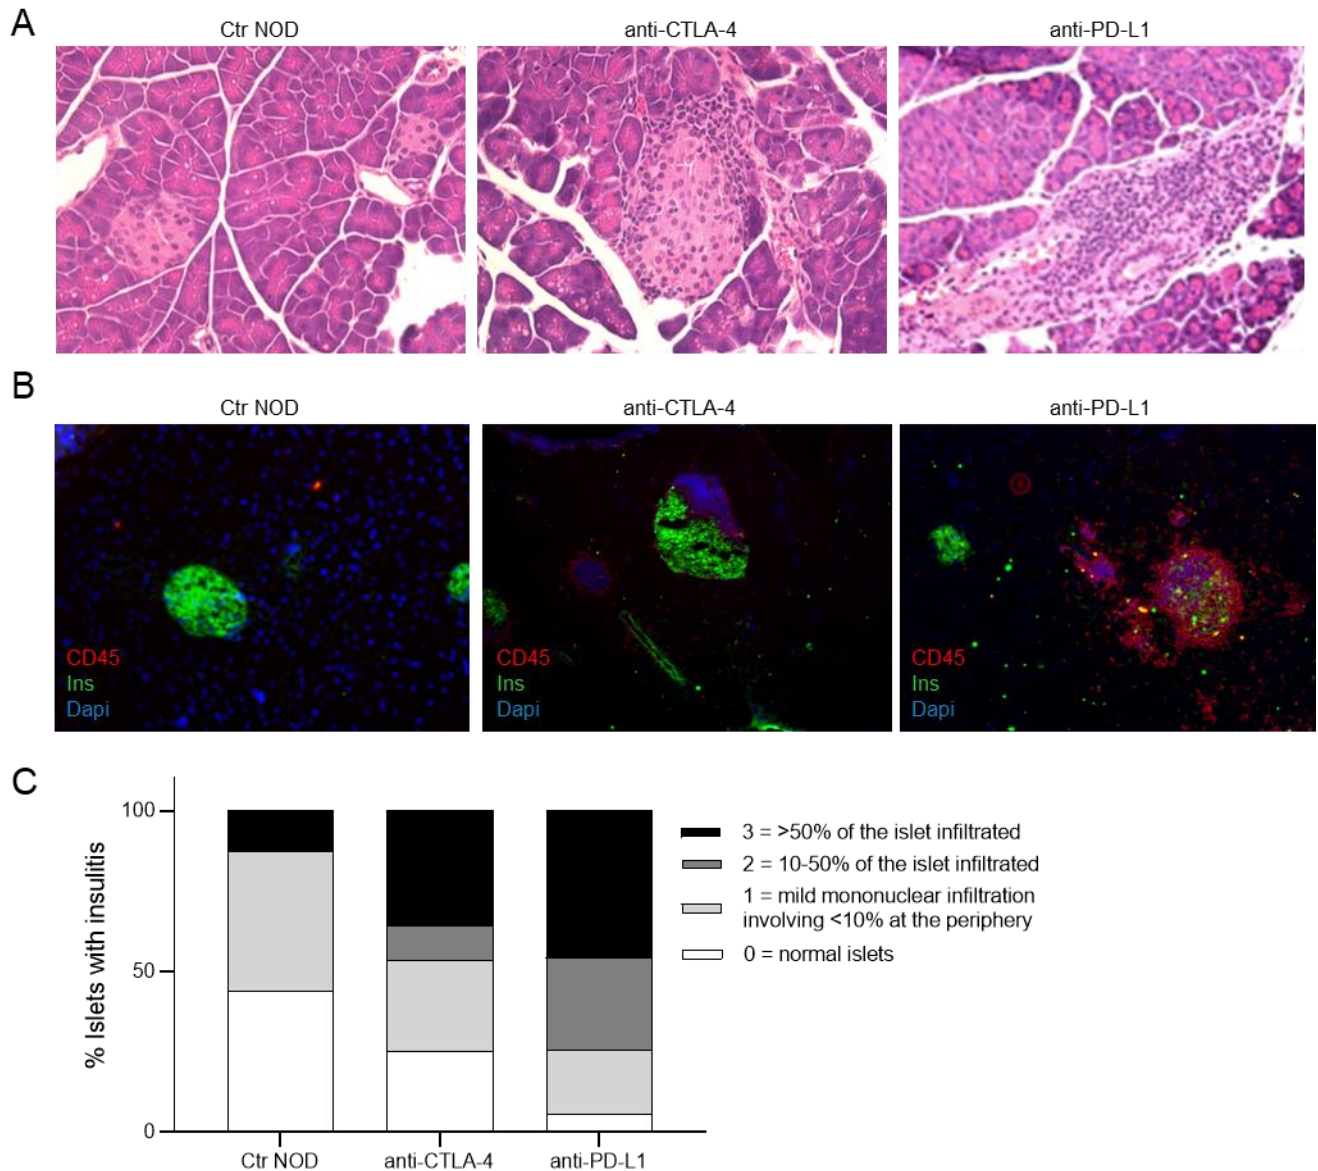

**Supplemental Figure 2. Development of diabetes in anti-PD-L1 treated NOD mice.**

(A) H&E and (B) immunofluorescent staining for CD45 and Insulin show immune infiltrates in islets from mice treated with anti-CTLA-4 and anti-PD-L1. (C) Grades of insulitis observed in anti-PD-L1 and anti-CTLA-4 treated NOD mice. N=16 islets for control NOD, N=56 islets for anti-CTLA-4 treatment, and N=35 islets for antiPD-L1 treatment. Chi-Square  $p < 0.0001$ . Taken with a 10x/25 eyepiece with 40x and 10x objective lens for (A) and (B) respectively (Leica DMi8).

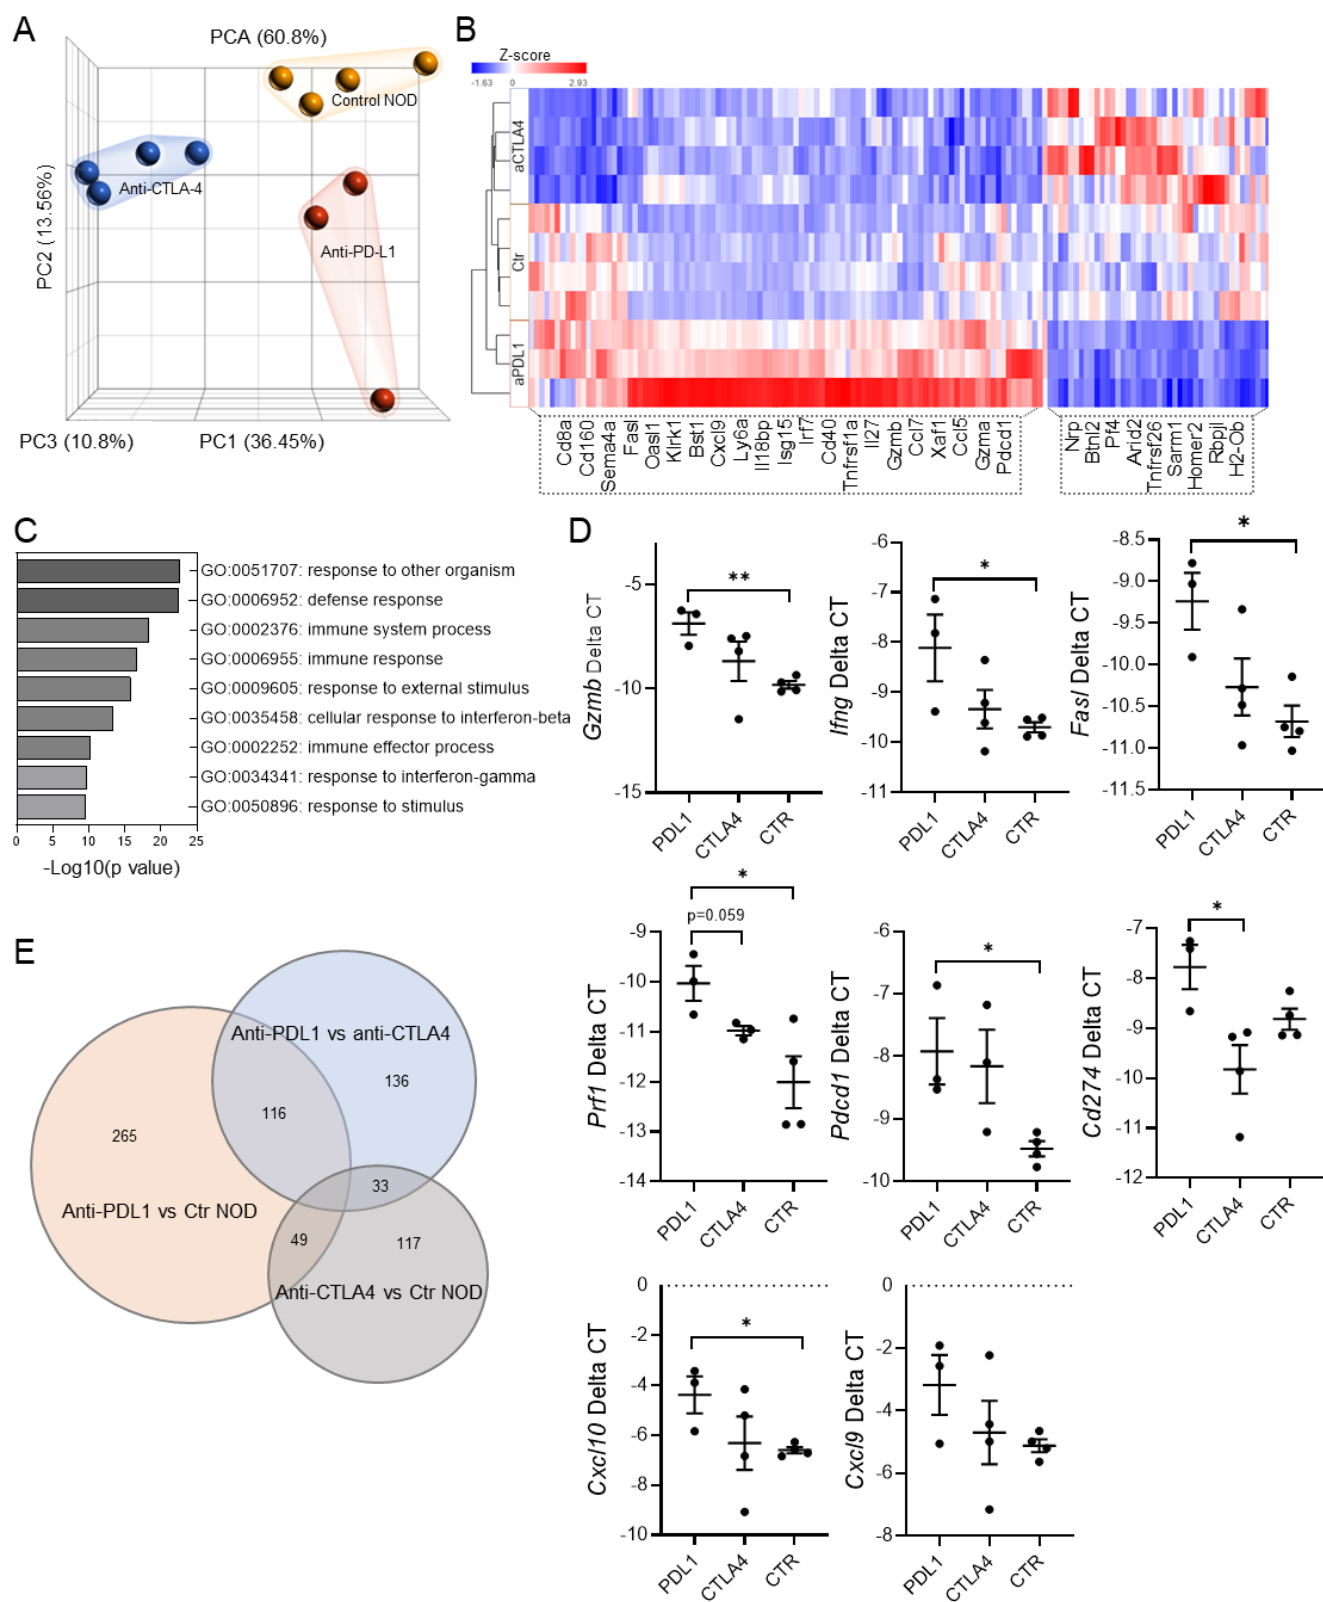

**Supplemental Figure 3. Islet infiltrating CD45+ cell transcriptional changes by bulk RNA-seq in anti-PD-L1 treated NOD mice.** 7-week-old NOD mice were treated with anti-PD-L1 or

anti-CTLA-4 and islets harvested prior to development of diabetes for bulk RNA sequencing to characterize differences in transcriptional changes between CPI treatments. They were compared to islets from 11-week-old NOD mice. **(A)** PCA plot showing 3 treatment groups for islet infiltrating CD45<sup>+</sup> cells. N=4 for anti-CTLA-4 (blue), N=3 for anti-PD-L1 (red), and N=4 for Control NOD (yellow). **(B)** Heatmap of 285 genes differentially expressed between anti-CTLA-4 and anti-PD-L1 treated CD45<sup>+</sup> cells. Differentially expressed genes were those with p value<0.05, fold change  $\geq 2$ , FDR step-up <0.1. **(C)** Top pathways representing the differentially expressed genes between anti-CTLA-4 and anti-PD-L1 treated CD45<sup>+</sup> cells. **(D)** qPCR of cDNA from CD45<sup>+</sup> samples used in the bulk RNA-seq experiments confirms changes in select genes. Mean  $\pm$  SEM. N=3 for anti-PD-L1, N=3-4 for anti-CTLA-4, and N=4 for control NOD. \*p<0.05, \*\* p $\leq$ 0.01 by Student's t test. **(E)** Venn diagram depicting overlapping differentially expressed genes among treatment groups.

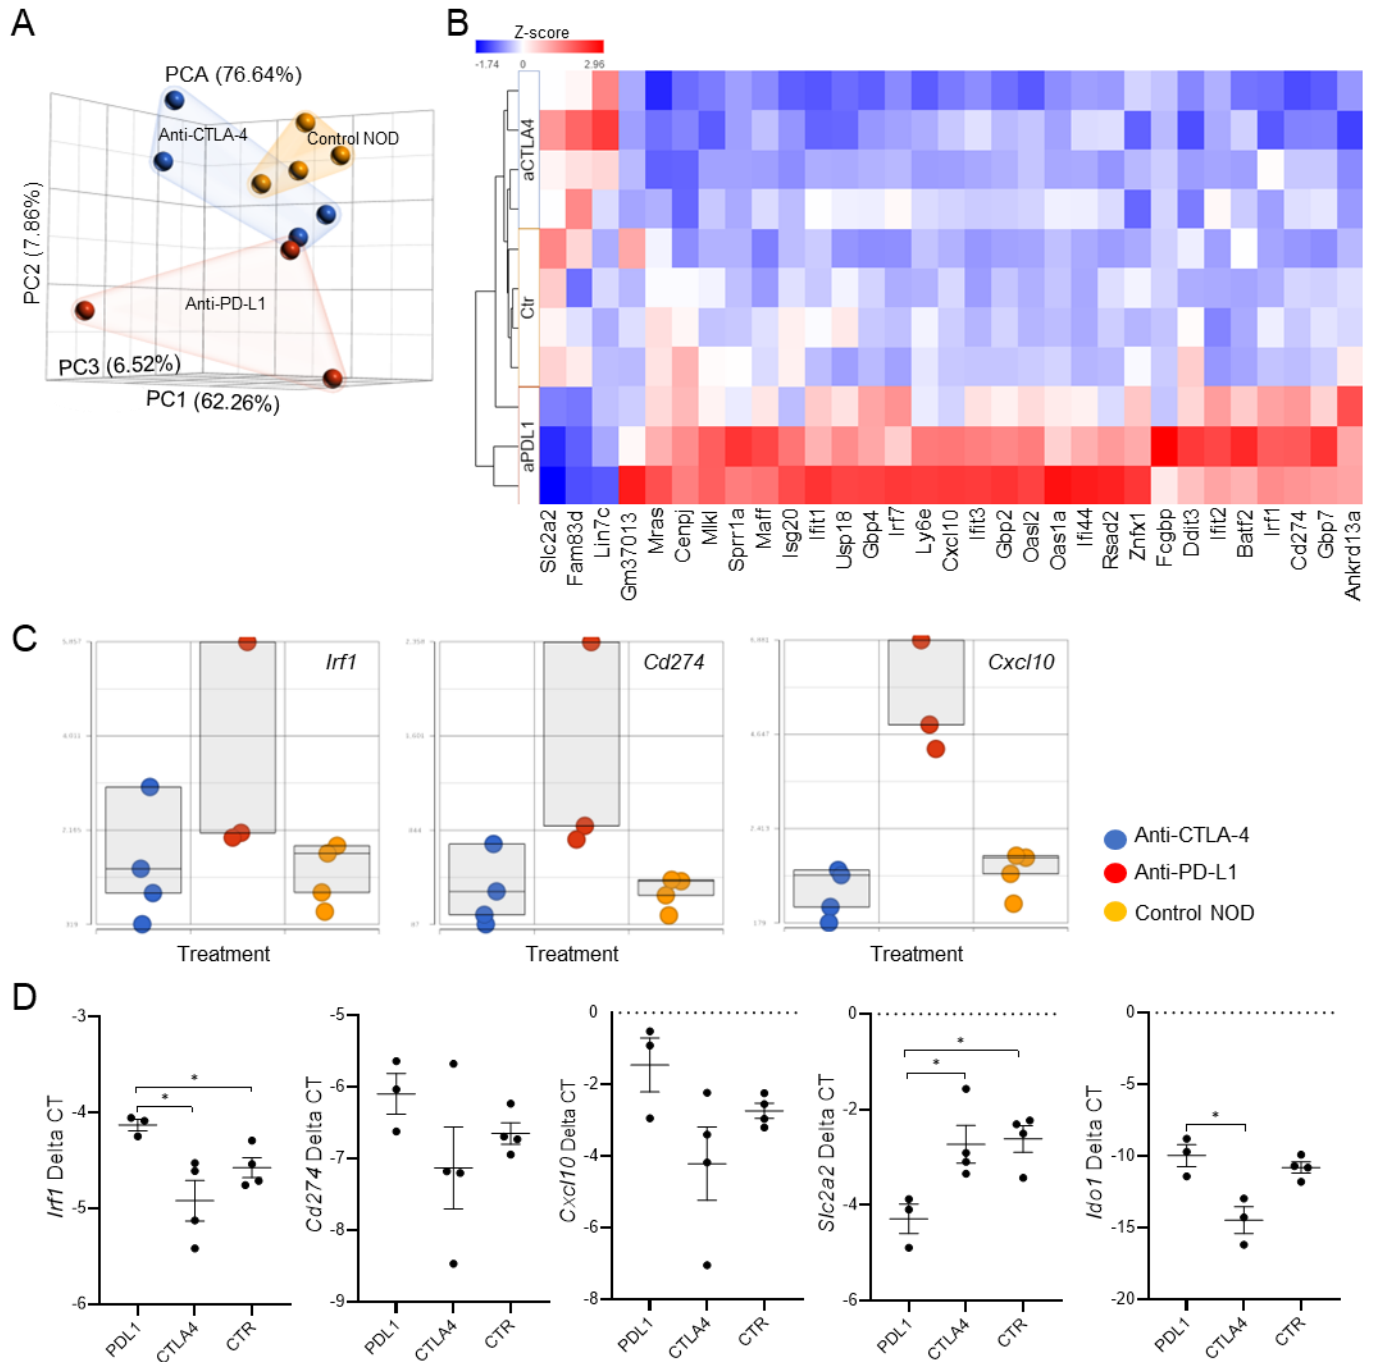

**Supplemental Figure 4. Transcriptional changes in islet cells in response to checkpoint inhibition in NOD mice by bulk RNA-seq.** (A) PCA plot showing 3 treatment groups for non-immune (i.e. CD45-) islet cells. N=4 for anti-CTLA-4, N=3 for anti-PD-L1, and N=4 for Control NOD. (B) Heatmap of 31 genes differentially expressed between anti-CTLA-4 and anti-PD-L1 treated CD45- cells. Differentially expressed genes were those with p value < 0.05, fold change  $\geq 2$ , FDR step-up < 0.1. (C) Example of differentially expressed genes among the treatment groups include *Irf1*, *Cd274*, and *Cxcl10*. (D) qPCR of cDNA from CD45- samples confirms changes in genes identified by RNA-seq. Mean  $\pm$  SEM. N=3 for anti-PD-L1, N=3-4 for anti-CTLA-4, and N=4 for control NOD. \*p < 0.05 by Student's t test.

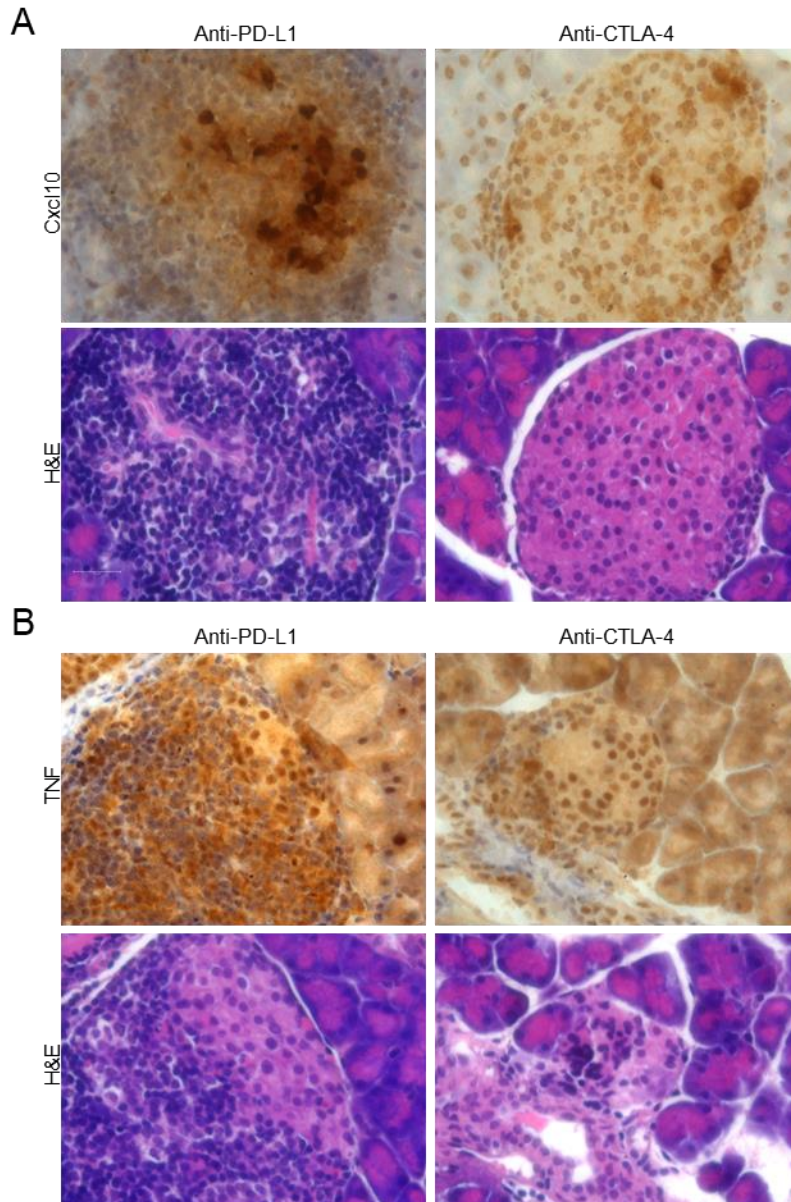

**Supplemental Figure 5. Expression of inflammatory mediators in pancreatic tissue from anti-PD-L1 treated NOD mice.** H&E and immunohistochemistry for (A) CXCL10 and (B) TNF $\alpha$  in pancreatic tissue from NOD mice following two doses of anti-PD-L1 or anti-CTLA-4 demonstrates expression of both inflammatory mediators in islet infiltrating cells of anti-PD-L1 treated mice. Scale: 25  $\mu$ m.

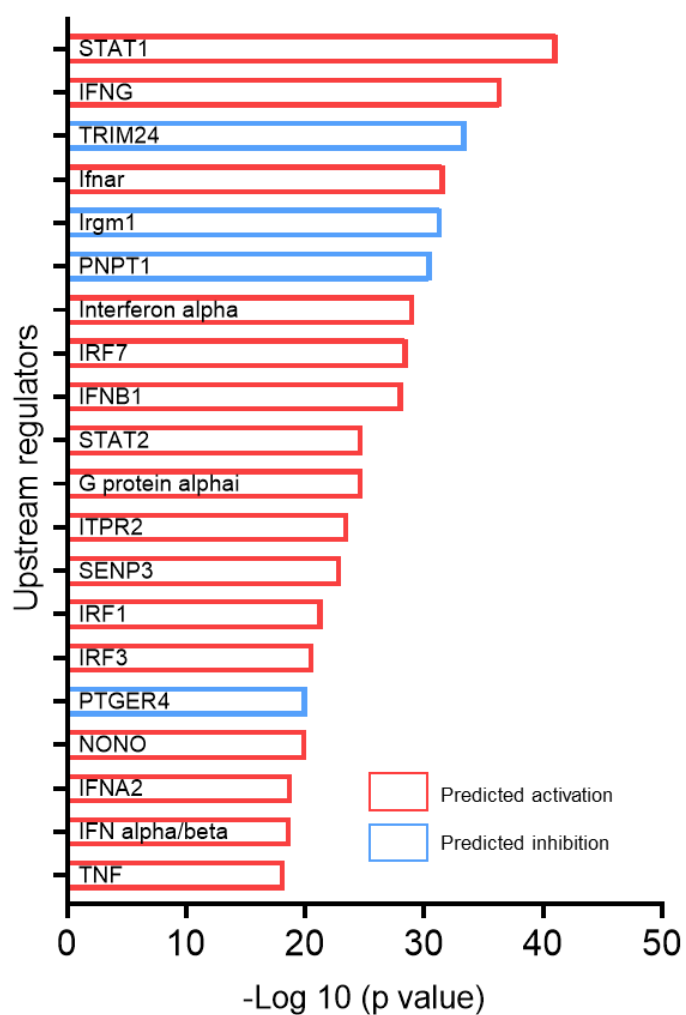

**Supplemental Figure 6. Differential upstream regulators with anti-PD-L1 treatment in  $\beta$  cells.** Top 20 predicted upstream regulators in anti-PD-L1 treated  $\beta$  cells compared to anti-CTLA-4 treated cells by scRNA-seq. Red=upregulated in anti-PD-L1  $\beta$  cells and Blue=downregulated in anti-PD-L1 treated  $\beta$  cells.

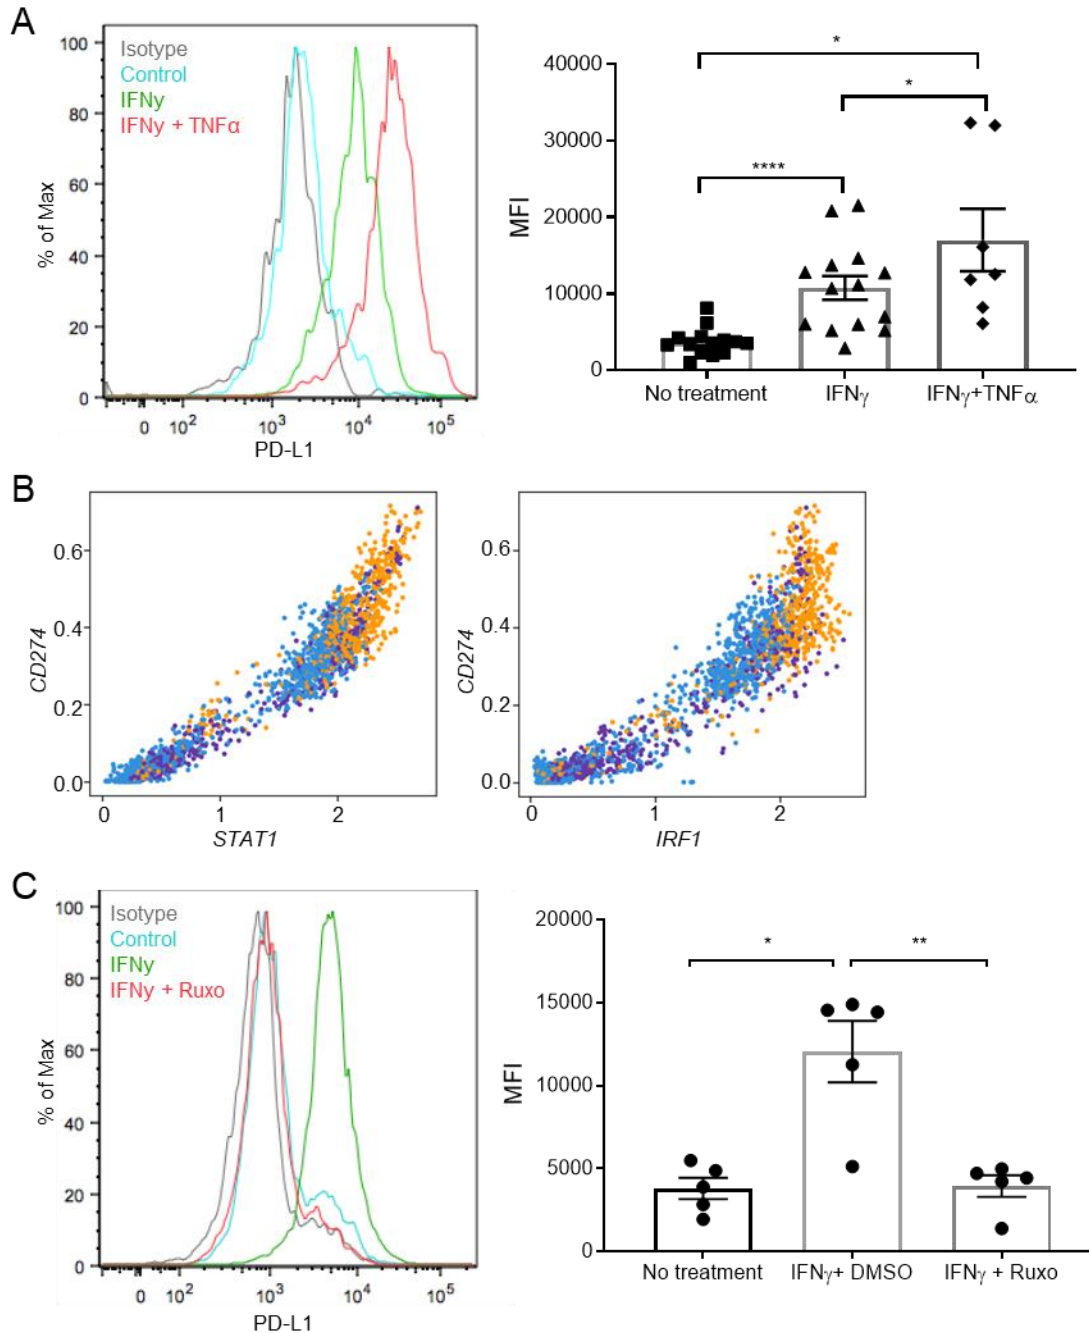

**Supplemental Figure 7. Induction of checkpoint molecules in  $\beta$  cells in response to IFN $\gamma$ .** (A) PD-L1 expression was significantly upregulated on  $\beta$  cells by FACS in islets cultured with IFN $\gamma$  (100ng/mL) with relative fold induction (mean (SEM)) 2.97(0.30) (range 1.49 to 5.61) vs media. TNF $\alpha$  (10 ng/ml) alone did not induce PD-L1 but had a synergistic effect on IFN $\gamma$  induction of PD-L1 (fold induction 5.38(1.03) compared to media alone and 2.04(0.21)-fold greater than IFN $\gamma$  only. N=14 for no treatment, 14 for IFN $\gamma$  treatment, 7 for IFN $\gamma$ +TNF $\alpha$ . \*p $\leq$ 0.05, \*\*\*\*p $\leq$ 0.0001 by Student's t test. (B) MELD analysis of RNA-seq data shows a strong correlation between PD-L1 and IRF1 ( $R^2=0.89$ ) and STAT1 ( $R^2=0.93$ ) expression. Blue,

orange and purple symbols represent cells from each islet donor. (C) Inhibition of JAK1/2 with 5  $\mu$ M Ruxolitinib (versus DMSO vehicle) resulted in reduced expression of PD-L1 in response to IFN $\gamma$  on  $\beta$  cells by FACS. Mean MFI $\pm$ SEM: 3,797 $\pm$ 647.2, 12,046 $\pm$ 1,852, 3,945 $\pm$ 1,852 for no treatment, IFN $\gamma$ +DMSO, and IFN $\gamma$ +Ruxo respectively. N=5 per treatment. (One-way ANOVA, \* $p\leq 0.05$ , \*\* $p\leq 0.01$  with Tukey's multiple comparison test).

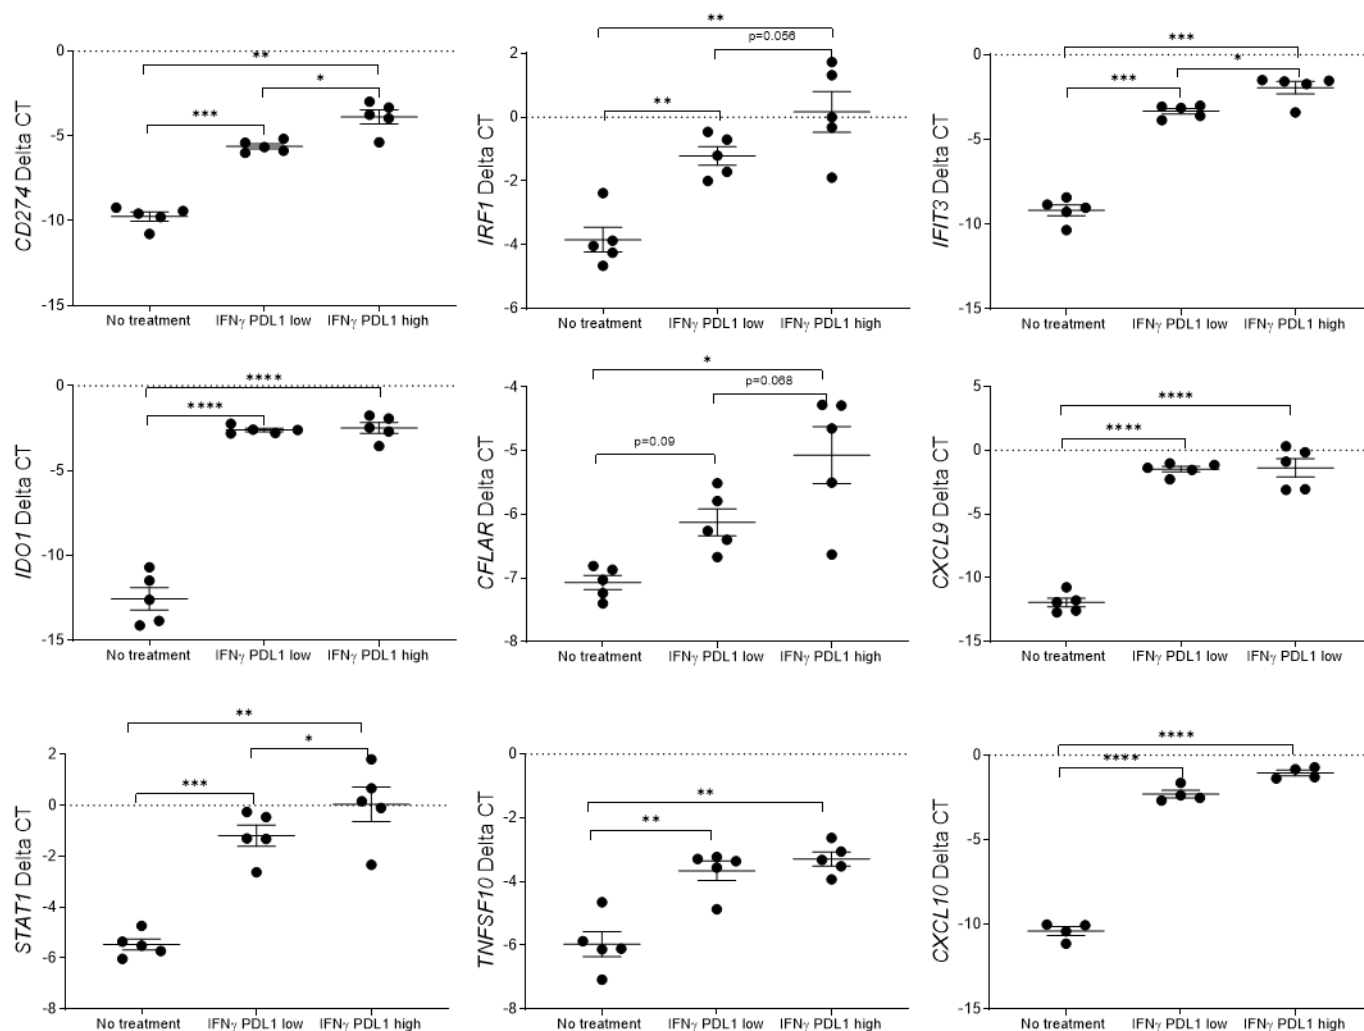

**Supplemental Figure 8. Confirmation of transcriptional changes by qPCR in human  $\beta$  cells in response to IFN $\gamma$ .** qPCR analysis confirmed induction of select genes identified to be differentially expressed in  $\beta$  cells with IFN $\gamma$  (25 ng/mL) treatment by RNA-seq. Induction of some genes was higher in FACS sorted  $\beta$  cells with higher PD-L1 expression in the presence of IFN $\gamma$ . N=5 for control and IFN $\gamma$  treatment, except for CXCL10 N=4. DNA was pooled from 3-6 control wells and 5-8 IFN $\gamma$  treatment wells. Mean  $\pm$  SEM. \* $p \leq 0.05$ , \*\*  $p \leq 0.01$ , \*\*\*  $p \leq 0.001$ , \*\*\*\*  $p \leq 0.0001$  by One-way ANOVA.

Supplemental Table 1: Clinical characteristics of patients with cancers in these studies

|                                                                 | <b>CPI treated nondiabetic</b>                      | <b>CPI-DM</b>                                                                                     | <b>P-values*</b> |
|-----------------------------------------------------------------|-----------------------------------------------------|---------------------------------------------------------------------------------------------------|------------------|
| <b>Pancreatic enzyme analysis:</b>                              |                                                     |                                                                                                   |                  |
| # of patients                                                   | N=39                                                | N=22                                                                                              |                  |
| Therapy                                                         | Combination therapy: N=19<br>Monotherapy: N=20      | Combination therapy: N=13<br>Monotherapy: N=9                                                     | n.s.             |
| Cancers                                                         | 27 melanoma, 11 renal cell carcinoma, 1 lung cancer | 8 melanoma, 7 lung cancer, 5 renal cell carcinoma, 1 pancreatic cancer, 1 gastrointestinal cancer |                  |
| Median age (# male)                                             | 60.9 yrs (24)                                       | 64 yrs (10)                                                                                       | n.s.             |
| Race                                                            | 37 White or Caucasian, 2 Other                      | 21 White or Caucasian, 1 Other                                                                    | n.s.             |
| Ethnicity                                                       | 37 non-Hispanic, 2 Hispanic or Latino               | 20 non-Hispanic, 1 Hispanic or Latino, 1 not available                                            | n.s.             |
| Median (range) time (wks) from first CPI treatment              | 16 (1, 173)                                         | 15 (2, 83)                                                                                        | n.s.             |
| Median (range) time (wks) between lipase check and DM diagnosis | NA                                                  | 0 ( -20, 18)                                                                                      |                  |
| <b>CT scan pancreatic volume analysis:</b>                      |                                                     |                                                                                                   |                  |
| # of patients (# male)                                          | N=5 (4)                                             | N=13 (7)                                                                                          |                  |
| Therapy                                                         | Combination therapy: N=2<br>Monotherapy: N=3        | Combination therapy: N=10<br>Monotherapy: N=3                                                     | n.s.             |
| Cancers                                                         | 2 melanoma, 3 renal cell carcinoma                  | 7 melanoma, 2 renal cell carcinoma, 3 lung cancer, 1 gastrointestinal cancer                      |                  |
| Median (range) time (wks) from CPI start to posttreatment CT    | 153 (84, 205)                                       | 87 (6, 221)                                                                                       | n.s.             |
| Median (range) time (wks) from DM onset to posttreatment CT     | NA                                                  | 59 (-0.6, 206)                                                                                    |                  |

\* By Student's t-test or Fisher's exact test as appropriate

Supplemental Table 2: Select genes elevated in immune cells in anti-PD-L1 treated mice by bulk RNA-seq

| Gene                                    | P-value | FDR step-up | Fold change |
|-----------------------------------------|---------|-------------|-------------|
| <i>Gzmb</i>                             | 1.2E-5  | 3.25E-3     | 3.12        |
| <i>Cxcl9</i>                            | 6.48E-5 | 0.01        | 3.60        |
| <i>Cd8a</i>                             | 3.26E-4 | 0.03        | 2.04        |
| <i>Pdcd1</i>                            | 4.94E-4 | 0.04        | 2.15        |
| <i>Gzma</i>                             | 6.87E-4 | 0.04        | 2.82        |
| <i>Fasl</i>                             | 1.19E-3 | 0.06        | 2.65        |
| Upregulated but not significant by FDR: |         |             |             |
| <i>Cd274</i>                            | 5.23E-3 | 0.14        | 2.00        |
| <i>Ifng</i>                             | 8.4E-3  | 0.18        | 2.07        |
| <i>Cxcl10</i>                           | 0.01    | 0.22        | 3.59        |
| <i>Prf1</i>                             | 0.02    | 0.25        | 2.85        |

Supplemental Table 3: Differentially expressed genes in islet cells from anti-PD-L1 versus anti-CTLA-4 treated mice by bulk RNA-seq

| Gene            | P-value  | FDR step-up | Fold change |
|-----------------|----------|-------------|-------------|
| <i>Sprr1a</i>   | 5.27E-11 | 6.92E-7     | 81.33       |
| <i>Ankrd13a</i> | 5.44E-7  | 3.57E-3     | 2.77        |
| <i>Ifit3</i>    | 4.61E-6  | 0.02        | 5.70        |
| <i>Mkl1</i>     | 8.48E-6  | 0.02        | 3.82        |
| <i>Irf1</i>     | 1.04E-5  | 0.02        | 2.17        |
| <i>Slc2a2</i>   | 1.05E-5  | 0.02        | -2.57       |
| <i>Cd274</i>    | 1.18E-5  | 0.02        | 3.38        |
| <i>Ifit2</i>    | 1.22E-5  | 0.02        | 3.61        |
| <i>Gm37013</i>  | 1.39E-5  | 0.02        | 16.95       |
| <i>Oas1a</i>    | 1.45E-5  | 0.02        | 5.85        |
| <i>Ddit3</i>    | 2.25E-5  | 0.02        | 2.06        |
| <i>Irf7</i>     | 2.27E-5  | 0.02        | 4.44        |
| <i>Ifi44</i>    | 2.5E-5   | 0.02        | 5.77        |
| <i>Gbp2</i>     | 2.54E-5  | 0.02        | 4.98        |
| <i>Gbp7</i>     | 6.01E-5  | 0.05        | 3.42        |
| <i>Cenpj</i>    | 6.1E-5   | 0.05        | 2.88        |
| <i>Fcgbp</i>    | 6.32E-5  | 0.05        | 14.20       |
| <i>Ly6e</i>     | 6.42E-5  | 0.05        | 2.59        |
| <i>Batf2</i>    | 6.85E-5  | 0.05        | 3.52        |
| <i>Isg20</i>    | 7.08E-5  | 0.05        | 2.63        |
| <i>Znfx1</i>    | 8E-5     | 0.05        | 2.10        |
| <i>Fam83d</i>   | 1.04E-4  | 0.06        | -8.40       |
| <i>Oasl2</i>    | 1.17E-4  | 0.06        | 3.54        |
| <i>Maff</i>     | 1.23E-4  | 0.06        | 3.00        |
| <i>Cxcl10</i>   | 1.24E-4  | 0.06        | 5.45        |
| <i>Usp18</i>    | 1.26E-4  | 0.06        | 2.58        |
| <i>Ifit1</i>    | 1.3E-4   | 0.06        | 3.80        |
| <i>Gbp4</i>     | 1.31E-4  | 0.06        | 4.66        |
| <i>Lin7c</i>    | 1.34E-4  | 0.06        | -2.55       |
| <i>Rsad2</i>    | 1.41E-4  | 0.06        | 4.30        |
| <i>Mras</i>     | 1.49E-4  | 0.06        | 2.03        |

Supplemental Table 4: Examples of IFN $\gamma$  responsive genes upregulated on  $\beta$  cells in main  $\beta$  cell cluster with anti-PD-L1 treatment compared to anti-CTLA-4

| Gene           | p-value  | log2fc   |
|----------------|----------|----------|
| <i>Cxcl10</i>  | 5.61E-16 | 2.637051 |
| <i>Cd274</i>   | 9.81E-15 | 3.323586 |
| <i>B2m</i>     | 3.05E-13 | 0.839975 |
| <i>Stat1</i>   | 6.64E-12 | 1.574758 |
| <i>Irf1</i>    | 6.50E-07 | 1.748058 |
| <i>Ccl5</i>    | 8.13E-07 | 3.614368 |
| <i>Ccl8</i>    | 1.93E-06 | 5.744423 |
| <i>Tnfsf10</i> | 3.84E-06 | 2.213323 |
| <i>Slc2a2</i>  | 2.02E-05 | -1.16702 |
| <i>Lgals9</i>  | 0.000196 | 2.521372 |

Supplemental Table 5: Human Islet Donors for Single Cell RNA-seq

| Donor | Age | Sex | Race      | BMI  | Cause of death                   | HbA1c |
|-------|-----|-----|-----------|------|----------------------------------|-------|
| 1     | 33  | F   | Hispanic  | 32.4 | Anoxic secondary to alcohol      | 4.9%  |
| 2     | 46  | M   | Hispanic  | 33   | Anoxic event secondary to stroke | 5.4%  |
| 3     | 58  | M   | Caucasian | 31.8 | Stroke                           | 5.9%  |

Supplemental Table 6: Human and mouse primers used in qPCR analysis

| Gene           | Forward                 | Reverse                 |
|----------------|-------------------------|-------------------------|
| Human primers: |                         |                         |
| <i>CD274</i>   | TGGCATTGCTGAACGCATTT    | TGCAGCCAGGTCTAATTGTTTT  |
| <i>IDO1</i>    | GCCAGCTTCGAGAAAGAGTTG   | ATCCCAGAACTAGACGTGCAA   |
| <i>STAT1</i>   | CGGCTGAATTTTCGGCACCT    | CAGTAACGATGAGAGGACCCT   |
| <i>IRF1</i>    | CTGTGCGAGTGTACCGGATG    | ATCCCCACATGACTTCCTCTT   |
| <i>IFIT3</i>   | AGAAAAGGTGACCTAGACAAAGC | CCTTGTAGCAGCACCCAATCT   |
| <i>CXCL9</i>   | CCAGTAGTGAGAAAGGGTCGC   | AGGGCTTGGGGCAAATTGTT    |
| <i>CXCL10</i>  | GTGGCATTCAAGGAGTACCTC   | TGATGGCCTTCGATTCTGGATT  |
| <i>FAS</i>     | AGCTTGGTCTAGAGTGAAAA    | GAGGCAGAATCATGAGATAT    |
| <i>TNFSF10</i> | CGTGTACTTTACCAACGAGCTGA | ACGGAGTTGCCACTTGACTTG   |
| <i>CFLAR</i>   | GACAGAGCTTCTTCGAGACAC   | GCTCGGGCATAACAGGCAAAT   |
| <i>ACTB</i>    | CATGTACGTTGCTATCCAGGC   | CTCCTTAATGTCACGCACGAT   |
| Mouse primers: |                         |                         |
| <i>Irf1</i>    | ATGCCAATCACTCGAATGCG    | TTGTATCGGCCTGTGTGAATG   |
| <i>Slc2a2</i>  | TCAGAAGACAAGATCACCGGA   | GCTGGTGTGACTGTAAGTGGG   |
| <i>Cxcl10</i>  | CCAAGTGCTGCCGTCATTTTC   | GGCTCGCAGGGATGATTTCAA   |
| <i>Cxcl9</i>   | GGAGTTCGAGGAACCCTAGTG   | GGGATTTGTAGTGGATCGTGC   |
| <i>Pdcd1</i>   | ACCCTGGTCATTCACTTGGG    | CATTTGCTCCCTCTGACACTG   |
| <i>Fasl</i>    | TCCGTGAGTTCACCAACCAAA   | GGGGGTTCCTGTAAATGGG     |
| <i>Ifng</i>    | ATGAACGCTACACACTGCATC   | CCATCCTTTTGCCAGTTCCTC   |
| <i>Gzmb</i>    | CCACTCTCGACCCTACATGG    | GGCCCCCAAAGTGACATTTATT  |
| <i>Ido1</i>    | CAAAGCAATCCCCACTGTATCC  | ACAAAGTCACGCATCCTCTTAAA |
| <i>Cd274</i>   | GCTCCAAAGGACTTGTACGTG   | TGATCTGAAGGGCAGCATTTTC  |
| <i>Prf1</i>    | AGCACAAAGTTCGTGCCAGG    | GCGTCTCTCATTAGGGAGTTTTT |
| <i>Actb</i>    | GGCTGTATTCCCCTCCATCG    | CCAGTTGGTAACAATGCCATGT  |
